# Supplementary material
Source: MDPI journal article supplement (https://www.mdpi.com/1996-1073/10/9/1296)
Supplement: s1 [file s1]

**Supporting Information**

**One-step Self-Assembly Synthesis α-Fe2O3 with Carbon Coated Nanoparticles for Stabilized and Enhanced Supercapacitors Electrode**

**Yizhi Yan, Haolin Tang** ***, Fan Wu, Rui Wang, and Mu Pan**

State Key Laboratory of Advanced Technology for Material Synthesis and Processing, Wuhan University of Technology, Wuhan 430070, Hubei, PR China; yanyizhi2005@163.com (Y.Y.); wu_fan@whut.edu.cn (F.W.); 512651259@whut.edu.cn (R.W.); panmu@whut.edu.cn (M.P.)

*Correspondence: thln@whut.edu.cn (Haolin. Tang); Tel: +86 27 8788 4448; fax: +86 27 8787 9468.





**Figure S1.** Thermogravimetric analysis-Differential scanning calorimetry (TG-DSC) curves of Fe2O3@C nanoparticle composite (after calcination in N2).

Thermal analysis is an effective way to determine carbon content of Fe2O3@C nanoparticle composite. Thermal analysis was carried out in air atmosphere at a rate of 10 °C/min. At the beginning of the low temperature, an exothermic peak was observed, and the mass seemed to slightly increase, which are probably attributed to the unstable heating rate. Then, two obvious exothermic peaks at 462.5 °C and 801.0 °C have appeared, respectively, which were caused due to the carbon decomposition. At 1000 °C, the mass of sample behaved to be stable, indicating that carbon decomposition was complete as well.

Since the Fe2O3@C sample has been calcined under N2 atmosphere at 350 °C for 2 hours during the preparation process, the amount of weight loss for the sample is equal to the mass of coating carbon. So the proportion of carbon in the system is estimated to be 3.91%.


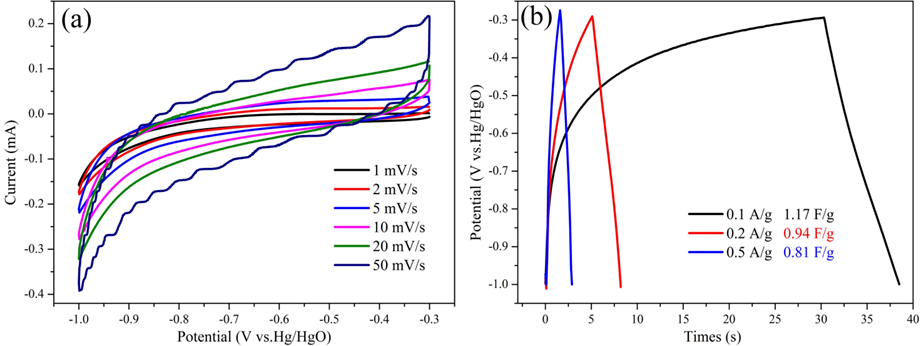


**Figure S2.** (**a**) CV curves at different scan rate and (**b**) charge-discharge curves at different current density of blank Ni foam without adding of Fe2O3@C electrode.

The CV and galvanostatic charge–discharges were performed in a three-electrode cell equipped with a piece of Ni foam (1 cm × 1 cm) as working electrode (without any active electrode material loaded on this Ni foam).





**Figure S3.** Nyquist plots of the Fe2O3@C sandwich structure working electrode; the inset is the equivalent circuit and the enlarged Nyquist plot in the high-frequency region.

After the Fe2O3@C sandwich structure working electrode was activated in 6 M KOH solution and before 2000 charge-discharge cycles test, the EIS behaviors had further been investigated. In general, the high frequency portion can be related to the resistance of the electrolyte (Rsol); the intermediate frequency portion is related to the double layer capacitance associated with the charge transfer resistance (Rct) in the charge/discharge process; the low frequency portion with sloped line is due to electronic diffusion Warburg impedance (WO).


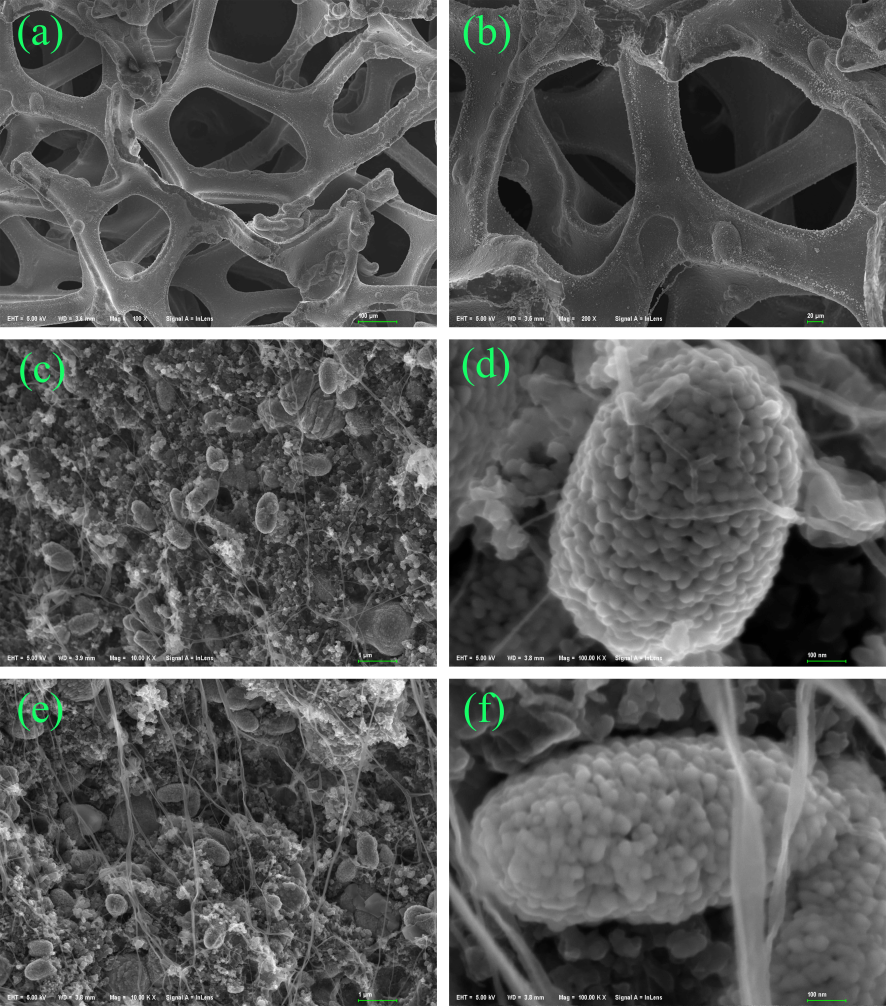


**Figure S4.** Field scanning electron microscopy (FESEM) images of (**a**, **b**) Ni foam; Fe2O3@C electrodes (**c**, **d**) before and (**e**, **f**) after 2000 cycles.

In order to compare the structure change of the Fe2O3@C electrode material before and after the cycling, the structure and morphology analyses were conducted by field scanning electron microscopy (FESEM, Zeiss Ultra Plus). After a series of tests (activation cycle, CV, charge-discharge test) and 2000 cycles, the Fe2O3@C sandwich structure working electrode was disassembled (
Figure S4 e,f). A fresh Fe2O3@C sandwich structure working electrode was also disassembled as comparison (Figure S4 c,d).

© 2017 by the authors. Submitted for possible open access publication under the
terms and conditions of the Creative Commons Attribution (CC BY) license (http://creativecommons.org/licenses/by/4.0/).
